# Supplementary material
Source: MDPI journal article supplement (https://www.mdpi.com/2072-4292/15/6/1521)
Supplement: s1 [file s1]

Archive with 2 entries (2 files):
- Animation_4Dmap_anomalies.gif
- Supplementary Materials_final_R1_clear_proof.pdf
