# Supplementary material
Source: MDPI journal article supplement (https://www.mdpi.com/2072-4292/15/6/1521)

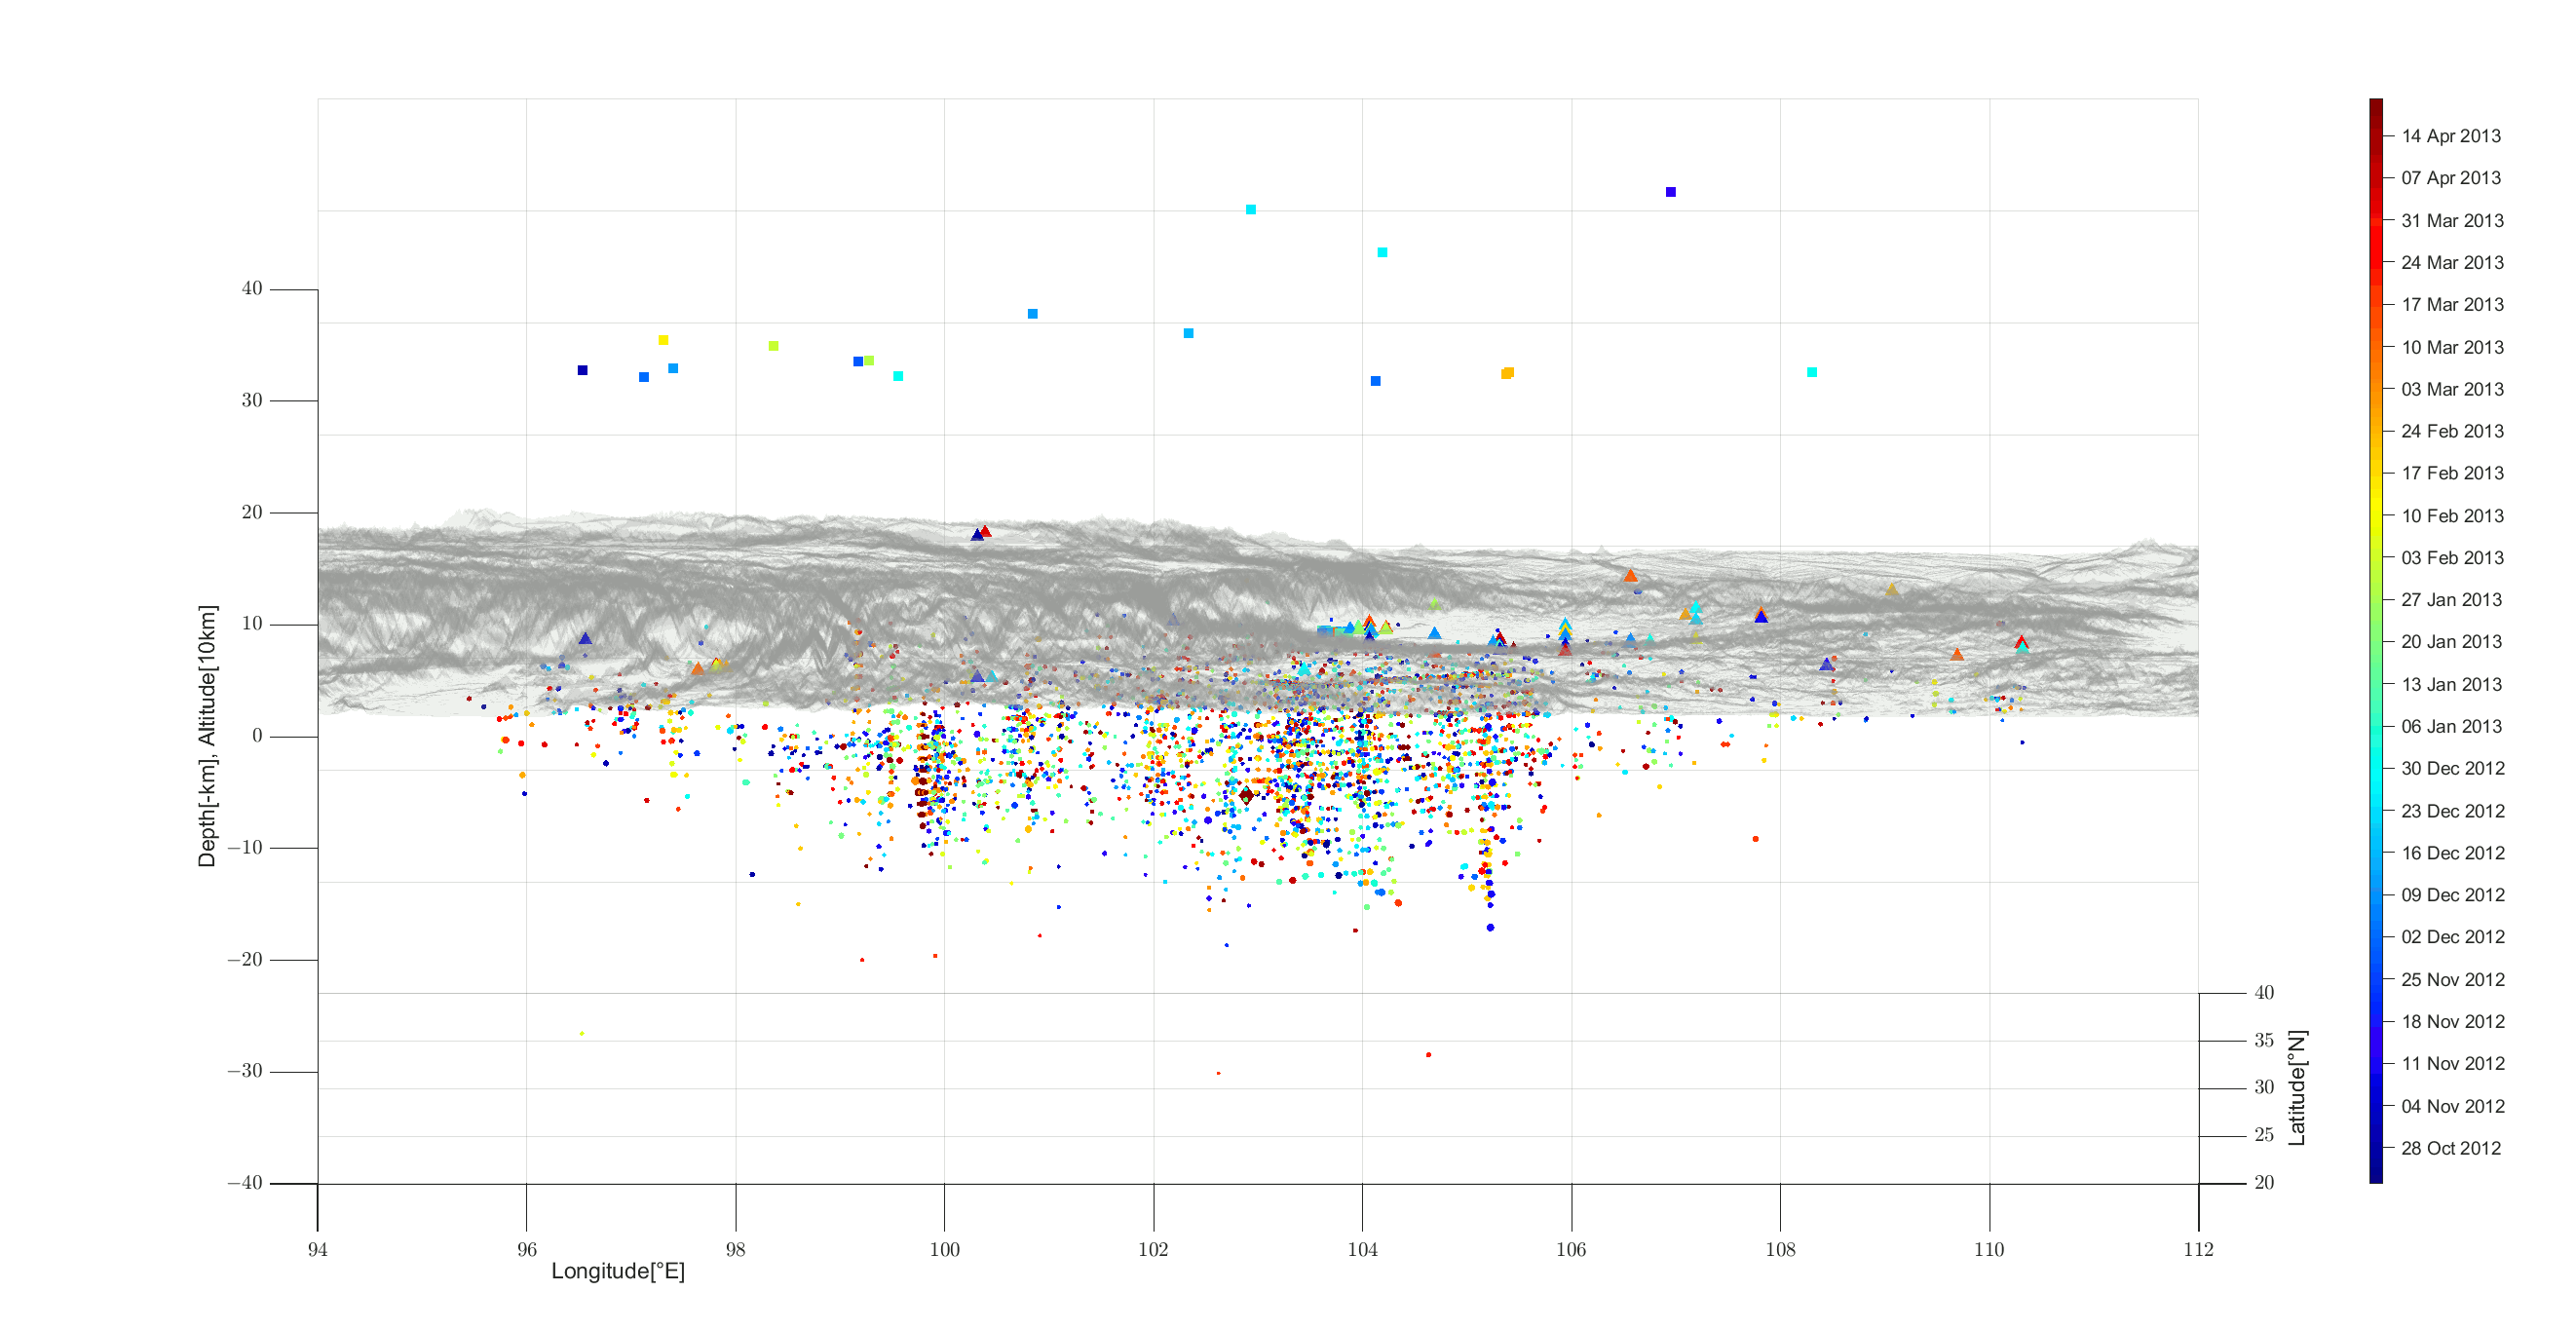

Supplement: s1 [file s1 › Animation_4Dmap_anomalies.gif]
